# Supplementary material
Source: ML conference proceedings conference paper supplement (https://openreview.net/forum?id=8OGTkEJrmb)

2-Gating

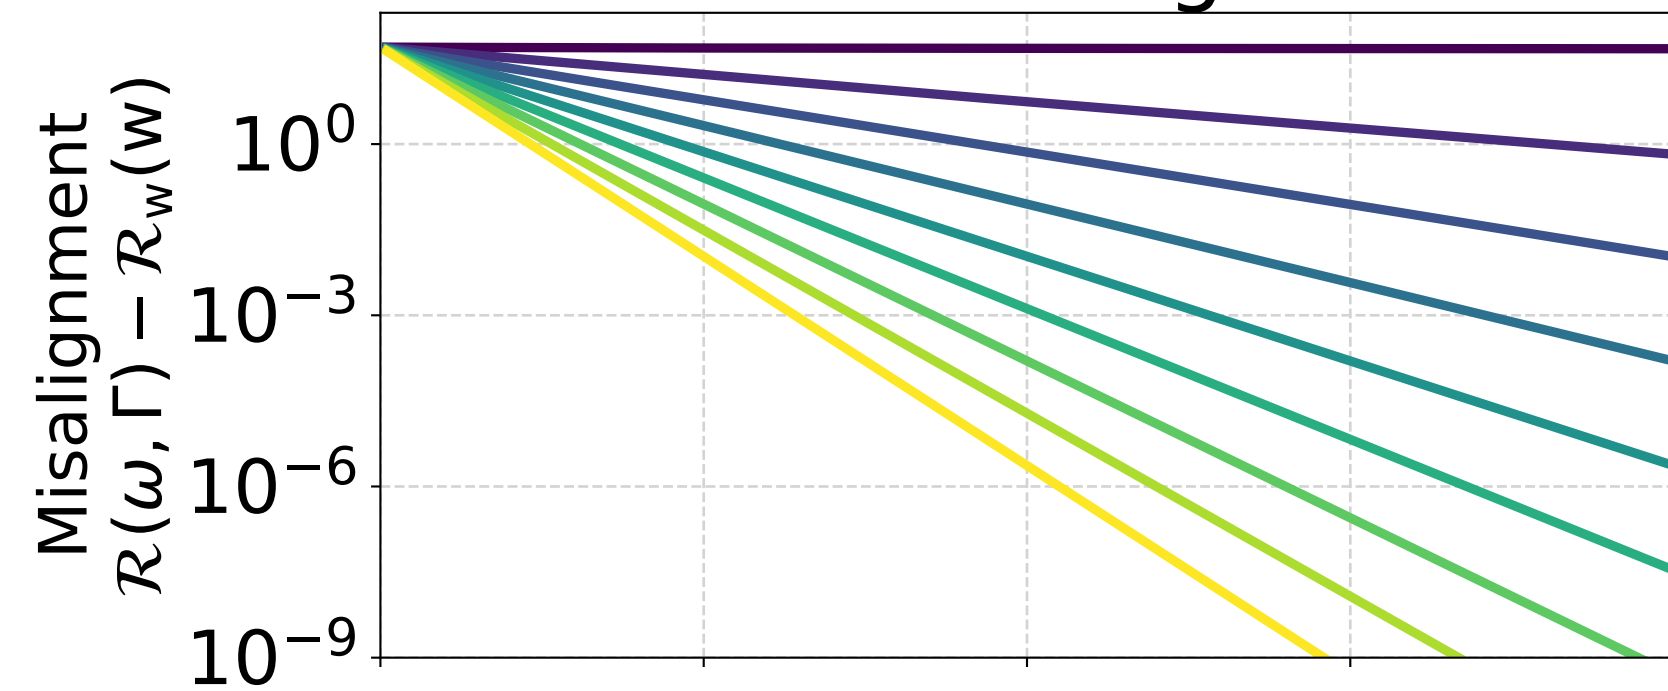

3-Gating

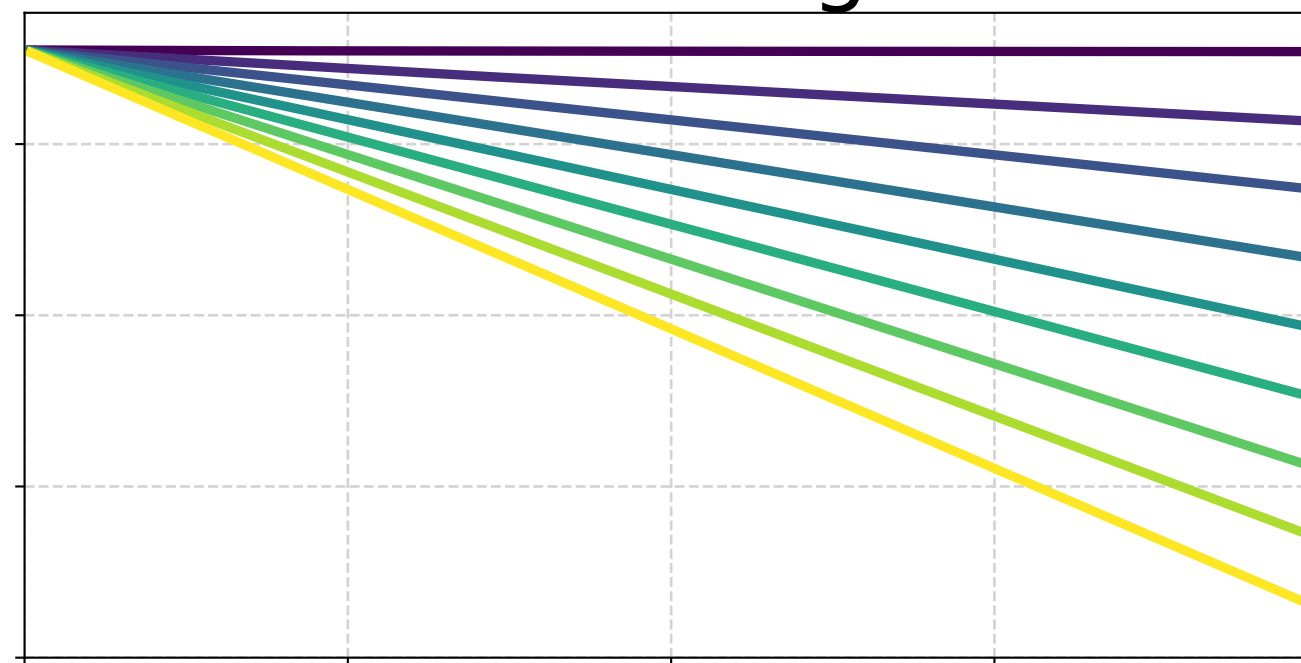

4-Gating

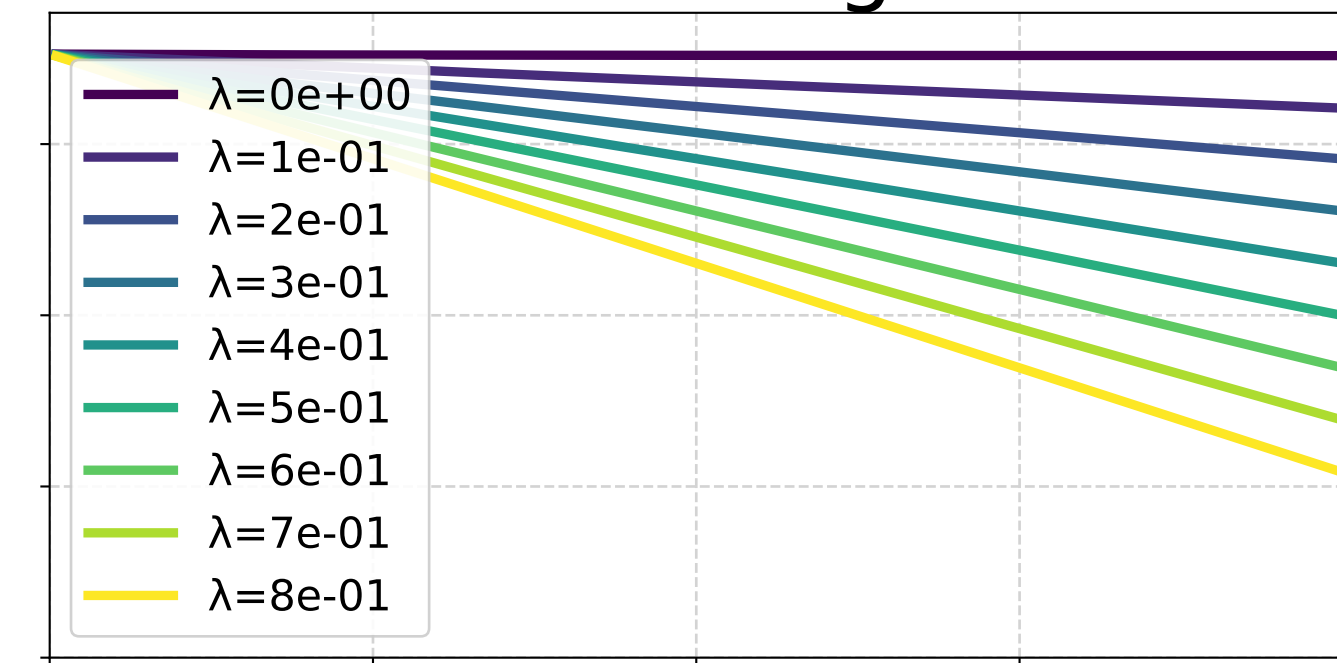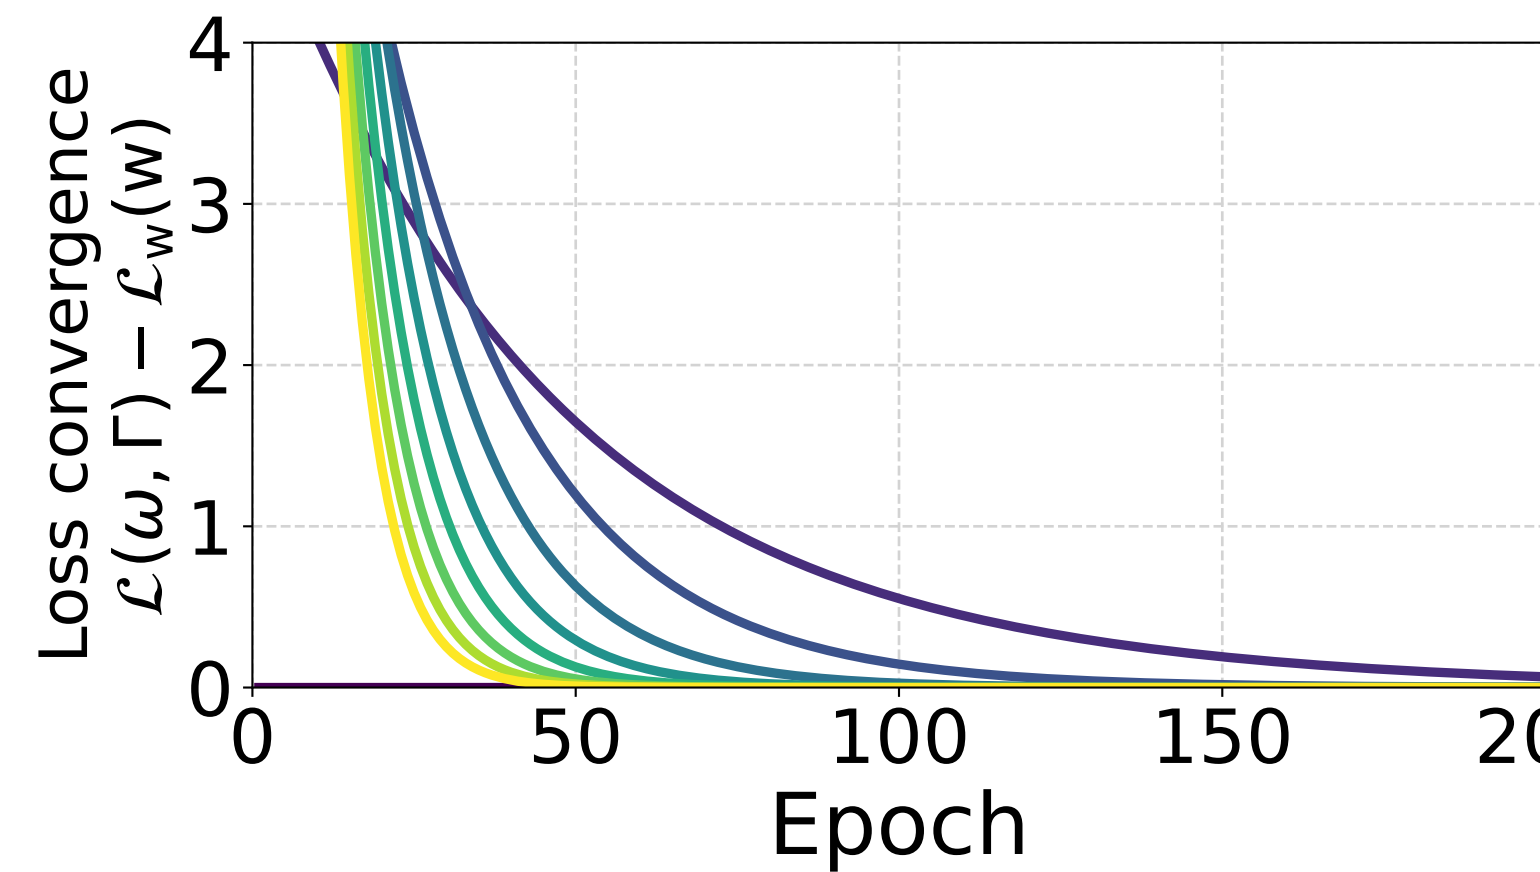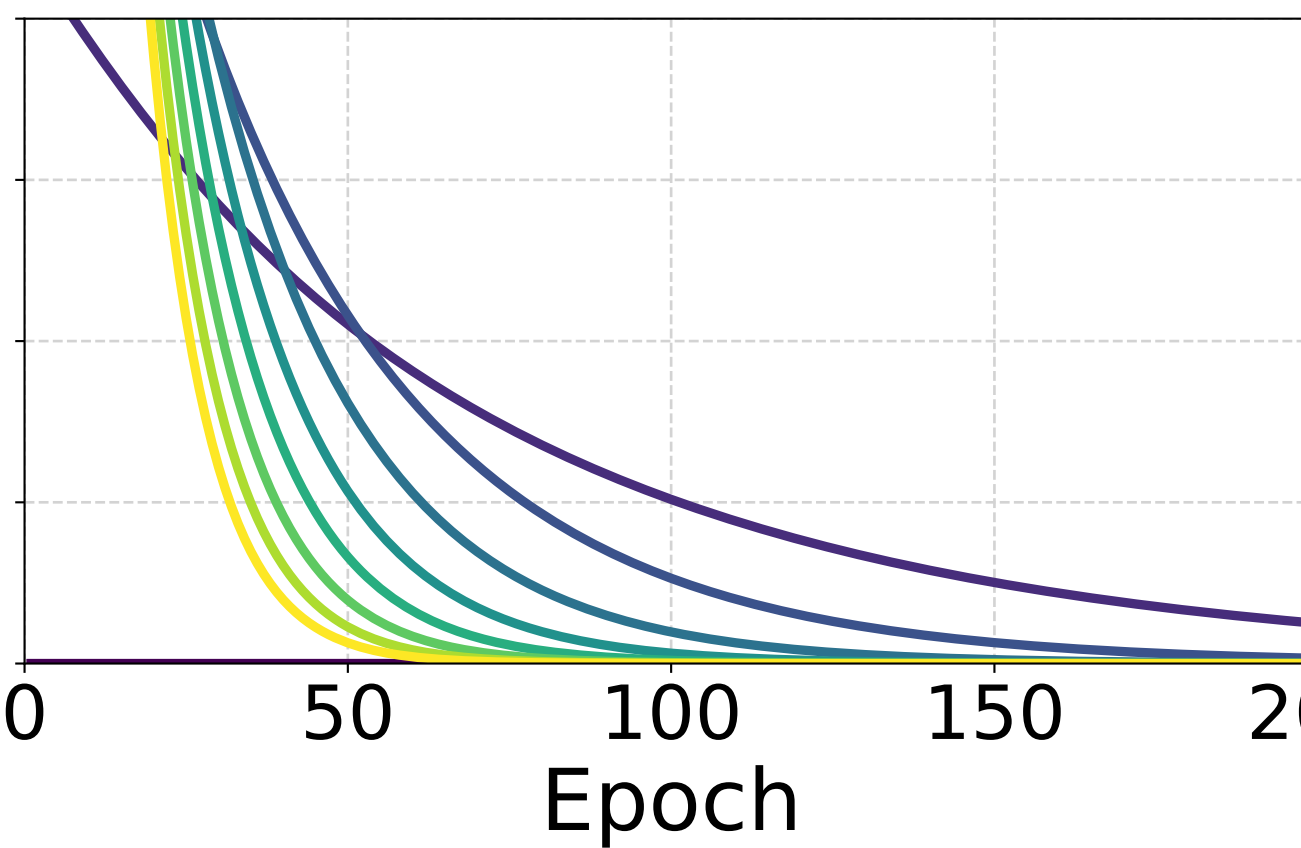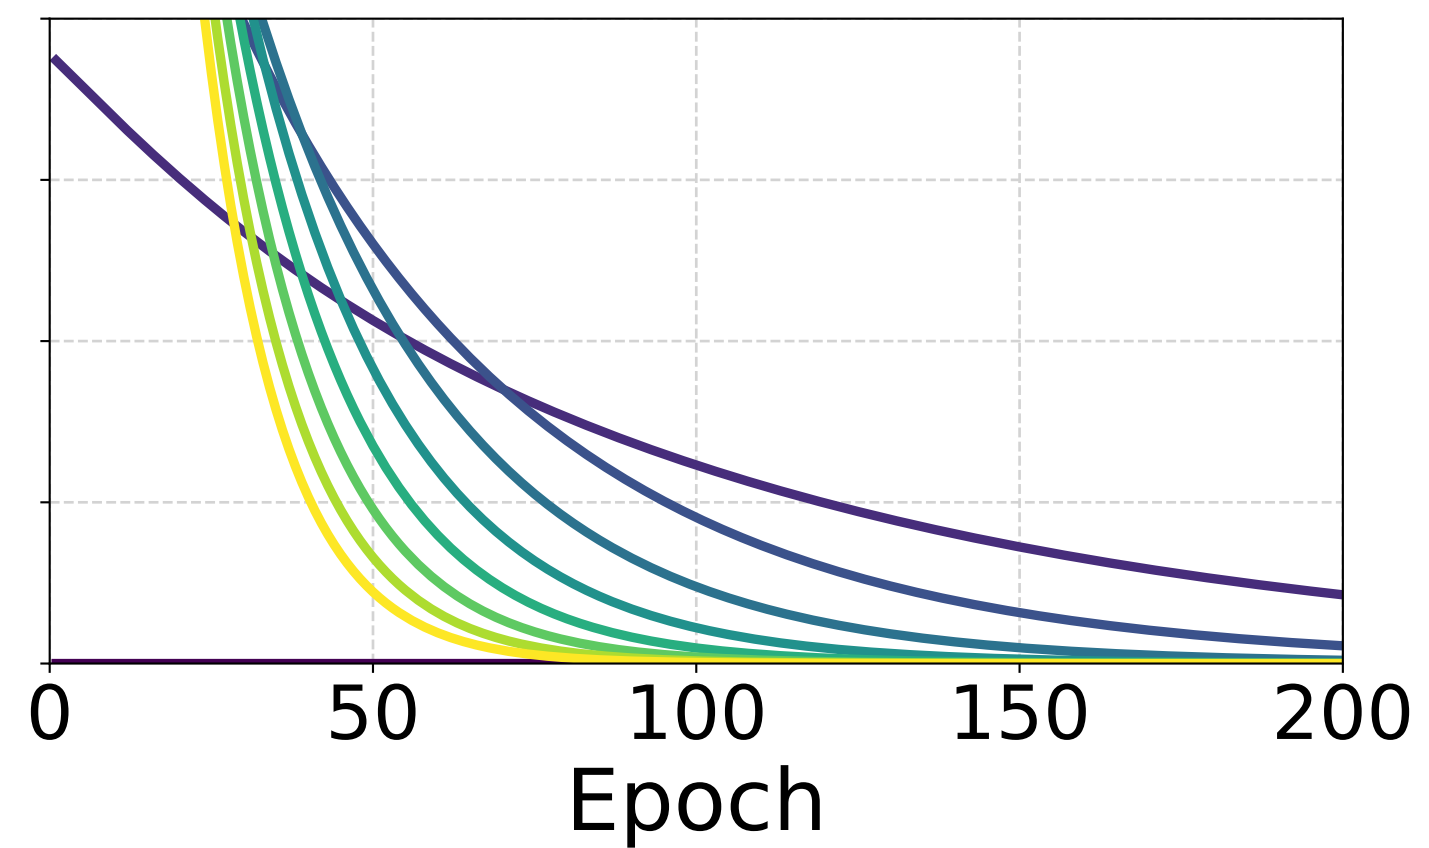

Supplement: supplementary_material [file combined_misalignment_lossdiff_lenet300100.pdf › results/lenet300100/mnist/combined_misalignment_lossdiff_lenet300100.pdf]

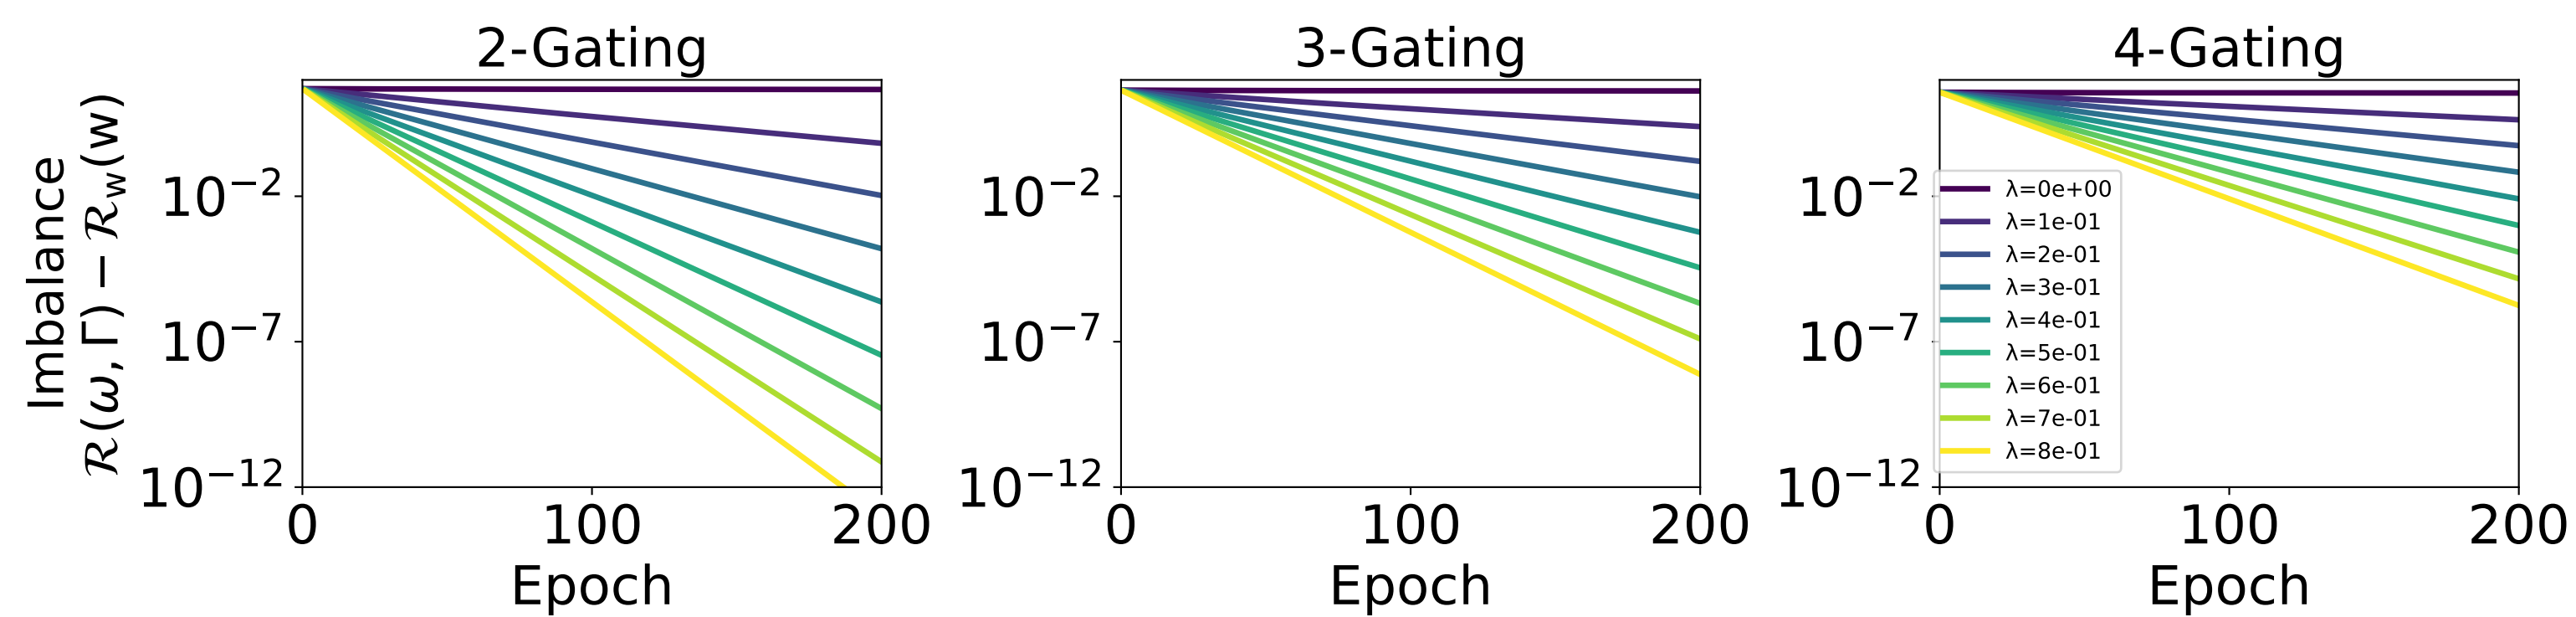

Supplement: supplementary_material [file imbalance_decay_lenet300100.pdf › results/lenet300100/mnist/imbalance_decay_lenet300100.pdf]

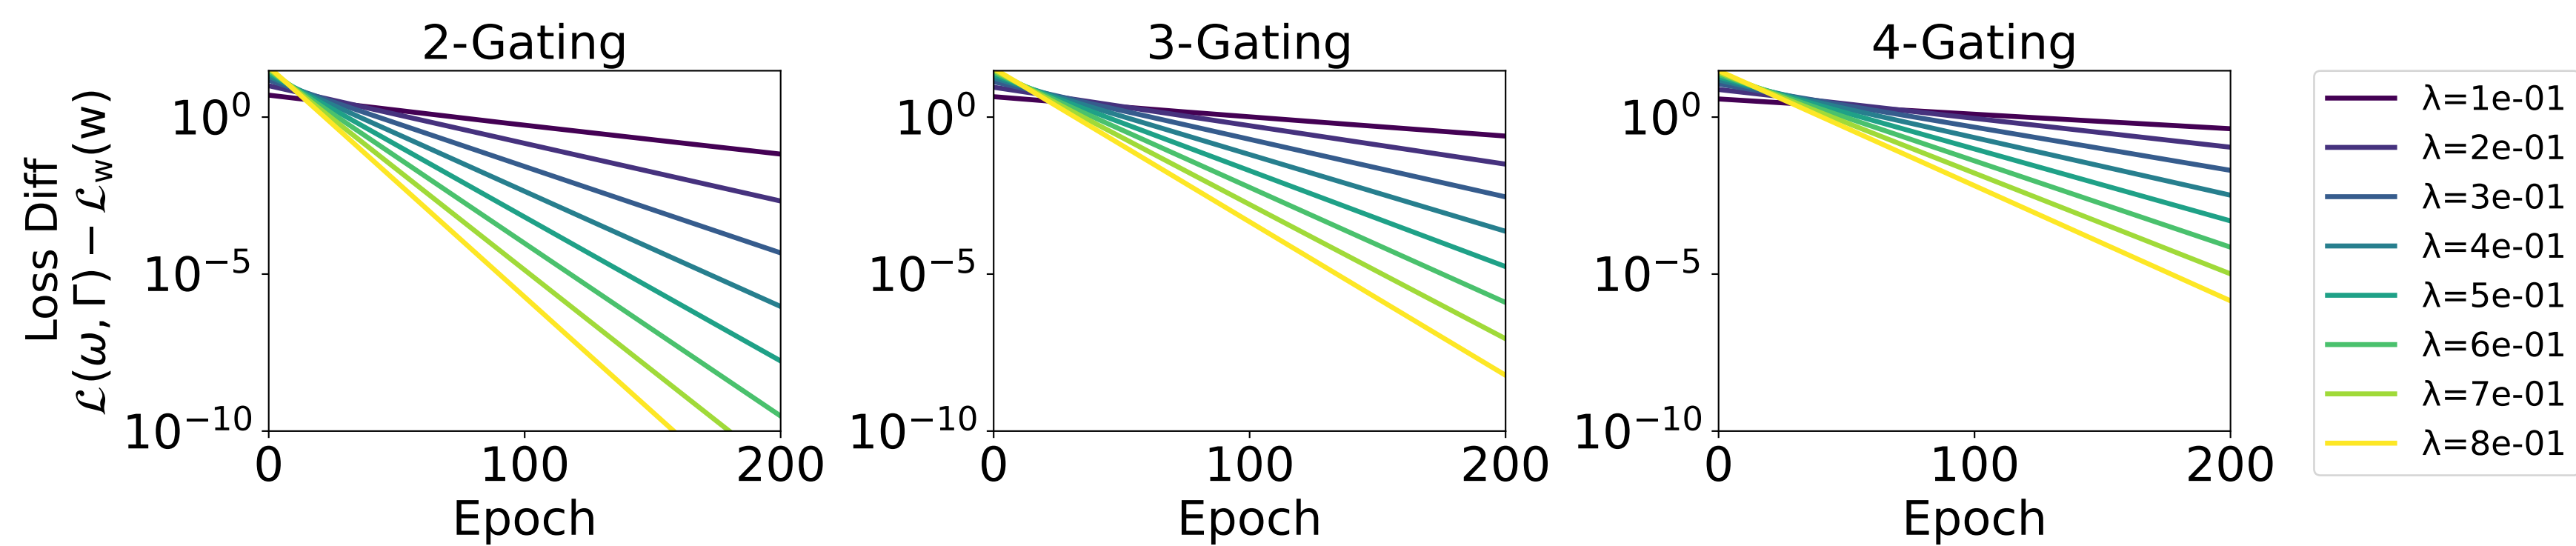

Supplement: supplementary_material [file lossdiff_decay_lenet300100.pdf › results/lenet300100/mnist/lossdiff_decay_lenet300100.pdf]
